# Supplementary material for: Sonification of Computer Processes: The Cases of Computer Shutdown and Idle Mode
Source: Front Neurosci. 2022 May 4;16:862663. doi: 10.3389/fnins.2022.862663 (PMC9114480; doi:10.3389/fnins.2022.862663)
Supplement: Supplementary file 1 [file Table_1.XLSX]

## Sheet: Foglio1
Response ID	Time Started	Date Submitted	Status	I have read the above information and I agree to participate in this study.	I agree to take part in this study.	I agree that information about me is processed in the manner described above.	I agree that my data is saved in the manner described above.	Age	Please specify your gender	Please describe your musical experience:	You are now ready to start listening to sounds! Please set the sound output of your computer to a comfortable level. You can do this using the video below, then press NEXT.	SD1_IM1	SD1_IM2	SD1_IM1inv	SD1_IM2inv	SD2_IM1	SD2_IM2	SD2_IM1inv	SD2_IM2inv	SD1inv_IM1	SD1inv_IM2	SD1inv_IM1inv	SD1inv_IM2inv	SD2inv_IM1	SD2inv_IM2	SD2inv_IM1inv	SD2inv_IM2inv	aes-SD1	aes-SD2	aes-SD1inv	aes-SD2inv	comment-shutdown	aes-IM1	aes-IM2	aes-IM1inv	aes-IM2inv	comment-idlemode
35	Dec 13, 2021 6:59:12 am	Dec 13, 2021 7:51:25 am	Complete		Yes	Yes	Yes	32	Female	Semi-professional activity (several years of practice, skills confirmed)		1	1	1	1	1	1	1	1	1	1	0	1	1	1	1	1	20	65	60	70	I think they all sound great, but I am not sure if the word "pleasant" is the term I would use to describe them. The first one's background sound was very pleasant, but the high-pitched glitches are not so pleasant. I averaged the rating bc of that. Same for the second and last one, which have loud high-pitched noises at the end that are a bit too abrupt to be perceived as "pleasant". The third o…	25	80	55	65	As for the previous question I do not think that the loud high-pitched sounds are very pleasant. But all of the low freq sounds are :) I had to do a bit of averaging between the two experiences.
47	Dec 15, 2021 3:53:45 am	Dec 15, 2021 4:10:17 am	Complete		Yes	Yes	Yes	30	Prefer not to answer	Expert or full-professional activity		0	1	1	1	0	0	0	0	1	0	0	1	0	0	0	0	19	36	62	54	Some of it sounded like a person blowing and throwing gummy super-balls in an organ pipe. Some other reminded my of some tribal house music played with a contrabass clarinet.	26	60	39	56	The ones that sounded more electronic (as with less reverberation) in my head could relate to some poor electroacoustic improvisation piece, the other ones could be some wind instruments in which I could at least somehow recognize a playing style/technique.
49	Dec 16, 2021 4:09:18 am	Dec 16, 2021 4:26:38 am	Complete		Yes	Yes	Yes	40	Female	No experience		0	1	0	0	0	0	1	0	0	0	0	0	0	0	0	0	70	40	10	10	No	10	70	40	10	No
51	Dec 16, 2021 11:24:47 am	Dec 16, 2021 11:58:30 am	Complete		Yes	Yes	Yes	28	Male	Expert or full-professional activity		0	0	1	0	0	0	1	0	0	0	0	0	0	0	0	0	80	34	0	29	The sounds themselves are quite nice: no doubt about this. The dyscrasia between the 'computer shut-down idea' (end of activities or no activity at all) and the amount/speed of sound events is amazing but in a few cases is unsettling, too. This last sensation has probably lead me to a negative rate somehow, especially when rhythm figures come out.	14	81	35	70	The sounds are still nice and pleasant. It seems that this type of computer event is more suitable for a musical moment, or maybe the static of this computer event allows to appreciate the nature of the sounds themselves.
53	Dec 16, 2021 1:19:13 pm	Dec 16, 2021 1:44:41 pm	Complete		Yes	Yes	Yes	48	Male	Some experience (advanced amateur, some years of practice)		1	1	0	0	1	0	1	0	0	1	0	1	1	0	0	1	64	53	46	36	I wouldn't really rank any of them as 'pleasant' but some have a better feel than others. The volume spikes are probably the most unpleasant aspect for me. I like the lower frequency sounds better than the higher but found the ones with LF content had more spikes which was annoying	63	80	24	69	The last one had the feeling of falling down stairs - which I quite liked!
54	Dec 17, 2021 5:05:45 pm	Dec 17, 2021 5:21:04 pm	Complete		Yes	Yes	Yes	40	Male	No experience		1	0	1	0	1	1	0	0	1	1	1	1	1	1	0	1	13	22	72	74	I heard some Shakuhachi flute sound and I may had some bias :)	60	89	18	18	No
56	Dec 20, 2021 9:02:07 am	Dec 20, 2021 9:17:10 am	Complete		Yes	Yes	Yes	26	Male	Semi-professional activity (several years of practice, skills confirmed)		0	0	0	0	1	0	1	0	1	0	1	0	1	0	1	0	20	40	25	50	Sometimers high frequencies or reverb are quite disturbing in different ways. I am not sure a computer shutting down should project a sort of a fake space	30	40	25	50	Same as before
60	Dec 20, 2021 11:51:33 am	Dec 20, 2021 12:17:40 pm	Complete		Yes	Yes	Yes	30	Female	No experience		1	0	0	0	1	0	0	0	1	1	1	1	1	1	1	0	5	76	68	59	nothing to disclose	33	56	11	23	nothing to disclose
61	Dec 20, 2021 1:16:33 pm	Dec 20, 2021 1:29:14 pm	Complete		Yes	Yes	Yes	58	Female	No experience		1	0	1	1	1	1	1	1	1	1	1	0	1	0	1	0	2	68	64	10	no	9	19	3	9	no
62	Dec 20, 2021 4:48:07 pm	Dec 20, 2021 5:27:26 pm	Complete		Yes	Yes	Yes	35	Male	Expert or full-professional activity		0	1	1	1	1	0	1	0	0	0	1	1	0	1	1	1	90	60	40	55	Donatoni vs Sciarrino	95	58	47	70	che figata gli ultrabassi
63	Dec 21, 2021 9:53:28 am	Dec 21, 2021 10:44:48 am	Complete		Yes	Yes	Yes	60	Male	Expert or full-professional activity		1	0	1	1	1	0	1	1	1	0	1	1	1	0	0	1	65	60	70	65	NO	65	75	70	70	No
66	Dec 21, 2021 12:30:38 pm	Dec 21, 2021 12:39:28 pm	Complete		Yes	Yes	Yes	40	Male	Expert or full-professional activity		1	1	0	0	1	1	1	1	0	1	1	1	1	1	1	1	29	71	15	60	I expect the Shutdown sound of a computer to be quick and not intrusive. I cannot imaging myself, at midnight, working from home, to listen to a harsh shutdown sound :)	41	71	22	46	Same comments as before
70	Jan 10, 2022 1:31:36 pm	Jan 10, 2022 1:53:31 pm	Complete		Yes	Yes	Yes	30	Female	Semi-professional activity (several years of practice, skills confirmed)		0	1	1	1	0	1	1	1	0	0	0	0	0	0	0	0	36	75	36	57	No	59	69	0	24	No
71	Jan 10, 2022 1:58:07 pm	Jan 10, 2022 2:13:45 pm	Complete		Yes	Yes	Yes	27	Male	Expert or full-professional activity		1	1	1	1	1	0	1	0	0	0	0	1	0	0	1	1	49	49	54	48	--	48	47	53	52	--
73	Jan 10, 2022 3:28:46 pm	Jan 14, 2022 4:03:48 am	Complete		Yes	Yes	Yes	34	Female	Expert or full-professional activity		0	1	1	1	0	0	0	0	0	0	0	0	0	0	0	0	100	50	61	31	My pleasantness of the sound is surly influenced by the musicality of the excerpts.	95	75	83	74	no
77	Jan 11, 2022 2:27:13 am	Jan 11, 2022 3:34:49 am	Complete		Yes	Yes	Yes	30	Male	Semi-professional activity (several years of practice, skills confirmed)		1	0	1	1	1	1	0	1	0	1	0	0	0	1	1	1	45	55	63	63	While they are interesting, I am not sure I can associate them to a computer shutting down. Shutting down is quite rapid, and these sounds are rather long. Also, they're quite uptempo which gives the impression of increasing intensity. The simple earcons used by e.g. Windows seem more intuitive somehow.	52	56	47	53	Idle sounds should in my opinion be of an 'ambient' nature and not draw attention. The first and fourth sound presented here did this best (not sure if they're randomized in order)
80	Jan 11, 2022 6:55:01 am	Jan 11, 2022 7:30:12 am	Complete		Yes	Yes	Yes	29	Female	Some experience (advanced amateur, some years of practice)		0	1	1	1	0	1	0	1	1	1	1	1	0	1	0	1	31	66	38	59	Sudden bursts contribute to making some sounds less pleasant, and rhythmical and repetitive sounds contribute to playfullness, making some more pleasant. I feels like all sounds are neither pleasant nor not pleasant, they all have aspects that distrub me but also amuse.	32	60	43	44	Similar as in the last group of sounds, but this time more melodic sounds contributed to pleasantness
81	Jan 11, 2022 9:48:05 am	Jan 11, 2022 10:16:55 am	Complete		Yes	Yes	Yes	44	Male	Expert or full-professional activity		1	1	1	1	1	1	1	1	0	0	0	0	0	0	1	0	36	37	71	18	Sounds inspired by M. Subotnick	31	60	36	26	No
82	Jan 11, 2022 9:57:44 am	Jan 11, 2022 10:14:52 am	Complete		Yes	Yes	Yes	49	Male	Expert or full-professional activity		0	1	1	1	0	1	0	1	0	0	0	0	0	0	0	0	75	50	50	25	Obviously the interpretation of pleasant is very subjective	75	50	50	25	Also subjective. I'm personally not too interested in the tonal sounds nor the imitations of acoustic sounds.
84	Jan 11, 2022 10:39:06 am	Jan 11, 2022 11:00:28 am	Complete		Yes	Yes	Yes	66	Male	Expert or full-professional activity		0	0	0	0	1	1	1	1	1	0	1	1	1	1	1	1	6	39	36	44	good to have a stronger melodic motif at the very end of the sound. I prefer the softer timbres.	35	64	12	31	the calm temporal regularity is good.
85	Jan 11, 2022 10:53:59 am	Jan 11, 2022 11:07:24 am	Complete		Yes	Yes	Yes	40	Female	Little experience (occasional amateur)		1	1	0	0	0	0	0	0	0	1	0	0	1	0	0	0	11	66	54	23	no	42	80	58	68	no
86	Jan 11, 2022 10:58:57 am	Jan 11, 2022 11:29:12 am	Complete		Yes	Yes	Yes	36	Female	No experience		0	0	0	0	1	0	1	1	0	0	1	0	1	0	1	0	34	60	21	89	no	27	86	18	53	no
87	Jan 11, 2022 10:04:15 am	Jan 11, 2022 12:16:15 pm	Complete		Yes	Yes	Yes	27	Male	Semi-professional activity (several years of practice, skills confirmed)		1	0	1	1	1	0	1	0	0	0	0	0	0	0	1	0	68	74	2	60	No	80	100	4	90	No
90	Jan 11, 2022 4:38:34 pm	Jan 11, 2022 4:55:44 pm	Complete		Yes	Yes	Yes	33	Female	Some experience (advanced amateur, some years of practice)		0	1	1	0	0	0	1	1	1	0	1	0	1	1	1	0	31	52	68	58	no	25	55	28	39	no
91	Jan 11, 2022 8:00:07 pm	Jan 11, 2022 8:23:51 pm	Complete		Yes	Yes	Yes	30	Female	Semi-professional activity (several years of practice, skills confirmed)		1	1	1	1	1	1	1	0	1	1	1	0	1	1	1	1	29	53	56	56	Not sure if the recordings are randomized, but the third one (for me) had a very insect-like timbre (buzzing, high frequency), and this contributed to my lower rating. The one I rated more highly tended to have more periodic, note-like qualities. However, I personally wouldn't call any of them particularly pleasant. :)	21	47	56	60	Similar comments here as in the computer shut-down mode - I believe to rate those with more periodic "notes" (more pure-tone-like) as more pleasant. For what it is worth, the third one in here (rated "47") sounds the most "eerie" to me, but also the most "idle" irrespective of its pleasantness.
93	Jan 11, 2022 9:30:22 pm	Jan 11, 2022 10:07:18 pm	Complete		Yes	Yes	Yes	43	Male	Expert or full-professional activity		0	1	1	1	1	1	1	1	1	0	1	1	1	1	1	1	76	89	71	96	I wasn't always sure whether to consider the reverb as part of the sound.	63	69	77	81	No
95	Jan 12, 2022 4:59:03 am	Jan 12, 2022 5:35:20 am	Complete		Yes	Yes	Yes	21	Male	Some experience (advanced amateur, some years of practice)		1	1	1	1	0	1	0	1	1	1	1	1	0	1	0	1	75	60	90	46	no	90	62	85	30	no
97	Jan 12, 2022 11:58:56 am	Jan 12, 2022 12:20:20 pm	Complete		Yes	Yes	Yes	31	Male	Semi-professional activity (several years of practice, skills confirmed)		0	0	1	0	0	0	0	0	0	0	0	0	0	0	0	0	20	60	60	80	These sound effects are sick. I want to know how you generated them! Also, as it pertains to the study, clips with a discernible up-tempo rhythm sounded like regular, ongoing activity, while clips with sporadic or slowing sounds felt like the activity was coming to a close.	20	60	20	40	My comment from the previous page applies to these as well.
98	Jan 12, 2022 11:58:00 am	Jan 12, 2022 12:20:34 pm	Complete		Yes	Yes	Yes	25	Male	Little experience (occasional amateur)		0	1	1	1	0	0	1	1	1	0	0	1	0	1	1	1	20	29	65	36	I expect a computer shutdown sound should be smooth and soft in the first 12 seconds. In the last 4 seconds, there could be a sudden sound, it could also just like the smooth style before.	75	81	45	57	More like music could be better.
99	Jan 12, 2022 1:08:15 pm	Jan 12, 2022 2:31:32 pm	Complete		Yes	Yes	Yes	55	Male	Expert or full-professional activity		1	1	1	1	1	1	1	1	1	1	1	1	1	1	1	1	35	76	50	60	no	35	58	47	71	no
100	Jan 12, 2022 3:55:41 pm	Jan 12, 2022 4:16:19 pm	Complete		Yes	Yes	Yes	33	Male	Semi-professional activity (several years of practice, skills confirmed)		0	1	1	1	0	0	1	1	0	1	0	0	1	1	1	1	65	60	60	62	I think in general they are interesting from a musical / sound design perspective. If they are supposed to be communicating any kind of information it is lost on me. It sounds like some various random-ish processes going into super-collider. *shrug* I am also biased towards finding those sorts of sounds VERY PLEASANT.	54	56	42	57	Same as previous.
104	Jan 14, 2022 5:58:41 am	Jan 14, 2022 6:45:02 am	Complete		Yes	Yes	Yes	48	Male	Expert or full-professional activity		1	0	0	0	1	1	1	1	1	1	1	1	1	1	1	1	11	56	43	62	In general I tend to find the high, granulated distorted sounds unpleasant in this context.	23	61	45	72	I think I the mellow, lower sounds are more reasssuring, the bright crunchier sounds signal alert/alarm, something is roughly treated, scratched or perhaps - an insect trying to get out?
106	Jan 15, 2022 12:03:03 am	Jan 15, 2022 3:33:15 am	Complete		Yes	Yes	Yes	31	Male	No experience		1	1	1	0	0	1	0	1	0	0	0	0	0	0	0	0	8	18	15	26	The sounds seemed artificial. It was difficult to judge which sound corresponds to a computer shutting down. Also, the sounds were limited. More variability in the sounds might help	9	41	24	26	None
108	Jan 19, 2022 3:41:11 am	Jan 19, 2022 4:07:17 am	Complete		Yes	Yes	Yes	24	Female	Little experience (occasional amateur)		1	0	0	0	1	1	1	1	1	0	0	0	1	0	0	1	15	60	80	75	No	15	75	70	75	No
109	Jan 19, 2022 7:05:15 am	Jan 19, 2022 7:39:40 am	Complete		Yes	Yes	Yes	28	Female	Some experience (advanced amateur, some years of practice)		0	0	1	1	0	1	0	0	0	0	0	0	0	0	1	0	12	59	22	77	No	25	23	31	33	No
110	Jan 19, 2022 1:18:39 pm	Jan 19, 2022 1:33:39 pm	Complete		Yes	Yes	Yes	55	Male	Expert or full-professional activity		1	1	1	1	1	1	1	1	1	1	1	1	1	1	1	1	15	34	47	56	No	17	43	36	62	No
111	Jan 19, 2022 3:53:01 pm	Jan 19, 2022 4:07:28 pm	Complete		Yes	Yes	Yes	27	Female	Little experience (occasional amateur)		1	1	0	1	0	1	0	1	1	1	1	1	0	1	0	0	35	2	35	3	Ciao Claudio	57	45	11	17	no
